# Supplementary material
Source: PubMed Central journal article supplement (PMC2748762)
Supplement: NIHMS143707-supplement-Supplemental.pdf [file NIHMS143707-supplement-Supplemental.pdf]

## **Materials and Methods**

### *Sample collection and DNA Isolation*

DNA was isolated from blood samples collected from registered dogs of established breeds with at least three generations of available pedigree data. DNA samples were collected from dog shows, competitions, and specialty events, by our group and the Waltham Center for Pet Nutrition (Supplemental Table 2). Pedigree analyses were used to ensure that only dogs with no common grandparents were included. Eight to 12 dogs from each breed from each of 76 breeds were selected for the initial data set. Additional dogs included in the mutation screen were selected without regard to pedigree relationships. Samples were collected by licensed veterinarians or trained veterinary technicians through venipuncture of the cephalic vein using standard protocols approved by the NHGRI Animal Care and Use Committee. In all cases blood samples were collected into ACD or EDTA anticoagulant and shipped at room temperature to the Ostrander laboratory. Samples were stored at 4<sup>0</sup>C prior to DNA extraction. DNA isolation was performed off-site using standard proteinase K/phenol-chloroform isolation methods by HealthGene, Inc (Ontario, Canada). Final samples were suspended in 10 mM Tris base, 0.1 mM EDTA, aliquoted and stored at -80<sup>0</sup>C.

### *Phenotype determination:*

Phenotype was determined based on the written ideal of each breed called the “breed standard”. Breed standards are developed by the breed club and published by the kennel club and include descriptions of traits, both physical and behavioral, that are considered

important or necessary to the individual breed. Dogs were considered chondrodysplastic and cases in the GWAS if their descriptions met the following three criteria:

- 1) Height  $\leq$  15 inches and height to length ratio  $< 1$ . Not symmetrical.
- 2) Skeletal structure of limbs described as heavy, ample, or well-boned especially in relation to overall size.
- 3) Forelimbs bowed, curved, and/or feet turned out.

All three criteria had to be met before a breed was considered a case in the GWAS.

Mutation screening revealed that two of three criteria are sufficient to identify a chondrodysplastic breed. Breeds with descriptions that suggested variation in these traits were removed from the analysis.

### *SNP genotyping*

Samples were genotyped using the Affymetrix Version 2, Canine SNP chip which lists approximately 127,000 features. The standard Affymetrix “GeneChip® Mapping 500K Assay” protocol was followed using 250 ng of phenol/chloroform extracted-DNA for each dog

([http://www.affymetrix.com/support/downloads/manuals/500k\\_assay\\_manual.pdf](http://www.affymetrix.com/support/downloads/manuals/500k_assay_manual.pdf)).

Before the hybridization step, the volume of the reaction was reduced to 35  $\mu$ l by heated evaporation to allow the entire reaction to be hybridized to the SNP chip. Genotypes were called using the BRLMM-p algorithm on batched sets of CEL files

([http://www.affymetrix.com/support/technical/whitepapers/brlmm\\_p\\_whitepaper.pdf](http://www.affymetrix.com/support/technical/whitepapers/brlmm_p_whitepaper.pdf)) (1).

All calls were combined into one data set. SNPs with a call rate of  $< 90\%$ , were heterozygous in  $> 60\%$  of individuals, or had discordant genotype calls in  $> 1/3$  of 158

duplicate pairs were discarded. Of these SNPs, 43 had minor allele frequencies of <1%. The resulting set of 41,635 informative SNPs was used in the association analysis described in this study. Complete list of SNPs is available at [http://research.nhgri.nih.gov/dog\\_genome/](http://research.nhgri.nih.gov/dog_genome/).

### *Association Analysis*

The data set was divided into cases and controls based on breed assignment with Pembroke and Cardigan Welsh Corgi, Dachshund, Basset Hound, Petit Basset Griffon Vendéen, Pekingese, Glen of Imaal Terrier, and Scottish Terrier considered “cases” and dogs from the remaining 64 breeds assigned as “controls”. Four breeds, (Jack Russell Terrier, West Highland White Terrier, Havanese and Sussex Spaniel) were assigned a “missing” phenotype because the standard description, history, or our own measurement data suggested that the leg length or shape was variable (2, 3). Single marker chi-squared association, model-based Fisher association, and haplotype association was performed using PLINK (4). Analysis was repeated with five overlapping subsets of 2-3 case breeds each to determine if all breeds were contributing to the association at the same locus.

Because dog breeds are highly structured populations, there is an inflation of  $p$ -values in association tests that is caused by the relatedness between samples within populations. One strategy for removing the cryptic relatedness is to use the allele frequencies within the population instead of the individual genotypes. For each breed, we first calculated the relative frequency of the minor allele at each marker and then conducted a Mann-Whitney U test comparing the frequencies in chondrodysplastic breeds with the frequencies in all other dog breeds. The test rejects the null hypothesis of

no association if there is a large difference in the median allele frequency between the two groups.

### *Fine Mapping*

For fine mapping additional SNPs were chosen from public databases utilizing the canine genome sequence (5) (<http://www.broad.mit.edu/node/459>, <http://www.ncbi.nlm.nih.gov/projects/SNP/>). Assays were designed for 95 SNPs from the 600 kb region around the peak of strongest association with an average spacing of 6.5 kb. SNPs were genotyped using the SNPLEX genotyping system and an ABI 3730XL genome analyzer with standard protocols (Applied Biosystems, Santa Clara, CA). Thirty-one SNPs either failed the genotyping assay or were not polymorphic and were therefore removed from further analysis.

Chi-squared analysis revealed 10 SNPs in the region with  $p$ -value of association  $<10^{-50}$ . The single strongest association was found at position 23,445,875, with a single marker uncorrected  $p$ -value of  $4 \times 10^{-109}$ .

T-test of significance in difference between heterozygosity measures in cases vs. controls was performed using the statistical package R.

Primers to surround all conserved segments within the haplotype and to tile across region of particular interest were designed using PrimerTile software (Peter Chines, personal communication) and the Primer3 program (6). Segments were amplified using standard PCR protocols and a 40 cycle, touch-down thermocycler program with the annealing temperature reduced by  $\frac{1}{2}$  a degree for the first 20 cycles, then held steady at the lowest temperature for the last 20 cycles. Primer sequences and annealing

temperatures can be found in Supplemental Table 4. Each segment was sequenced using BigDye terminator sequencing kits and standard protocols (Applied Biosystems, Santa Clara, CA) in 26 chondrodysplastic dogs from nine breeds and 18 non-chondrodysplastic dogs from 11 breeds.

### *Sequencing the Insert*

Primers surrounding the localized insertion were designed from the CanFam2 reference genome and used to generate a PCR product of ~5 kb using KOD Xtreme Hot Start DNA polymerase with an extension time of 9 min (Novagen, San Diego CA). The product was extracted from an agarose gel using QIAquick Gel Extraction Kit (Qiagen Corp., Valencia, CA) and then sequenced on an Illumina Genome Analyzer following the manufacturer's protocol. A total of 536,492 high-quality, 48-base reads were generated and assembled into contigs using the short-read assembly program Velvet (7). A variety of parameters were tested, and we determined that the optimal settings for this data set were a k-mer size of 29 and coverage-cutoff of 27. This produced five distinct contigs, one of which was 1,570bp in length and matched the *fgf4* cDNA using BLAT (<http://genome.ucsc.edu/>).

Additional primers were developed from the exon sequences and 3'UTR of the annotated *FGF4* gene and matched with sequence surrounding the insert in order to obtain the complete sequence of the insert and look for polymorphisms. Sequencing was performed as described in the fine mapping section. A complete list of primers can be found in Table S6.

### *Tissue collection*

*Fetal Tissue:*

Tissues were collected in accordance with the animal care and use protocols approved by Cornell University. Fetal tissues were obtained from pregnant dogs presenting at a non-profit spay and neuter clinic for reproductive surgery. Upon collection, fetuses were placed in RNAlater and stored for 1-3 days at 4°C. Excess RNAlater was poured off and the fetus was frozen at -80°C. Frozen limb samples were shipped on dry ice. Femoral and tibial heads from knee joints were removed using sterile procedures with the aid of a dissecting microscope and used for RNA extraction.

*Neo-natal tissue:*

Peripheral blood and articular cartilage were collected from a four week old F2 dachshund – beagle cross that was chondrodysplastic and homozygous for the insert. Blood was collected into ACD via cardiac puncture. Cartilage was dissected using sterile procedure from scapular wing, humeral joints, femoral joints, xiphisternum, and rib and diced into fragments approximately 1 mm thick. Fragments were placed in a 5x volume of RNA later (Ambion) in 1.7 mL eppendorf tubes and frozen by immersion in LN2. Frozen samples were shipped on dry ice. All procedures were performed in accordance with the animal care and use guidelines established and approved by the Baker Institute and Cornell University.

*Adult tissue:*

Sections of liver and full-thickness articular cartilage specimens from the humeral head were obtained from a 10 year-old male castrated Shih Tzu and a 10 year-old male castrated Siberian Husky immediately after euthanasia performed for reasons unrelated to this study. Collected specimens were placed in RNAlater (Ambion) immediately after

harvest, stored at 4°C overnight and then transferred to –80°C until shipped on dry-ice. Collection was performed in accordance with the animal care and use protocols of the University of Missouri.

### *RNA Analysis*

RNA was isolated from testes, cartilage and liver tissues stored in RNA-later® (Ambion, Austin TX). Adult cartilage was ground over dry ice using a mortar and pestle. Cartilage fragments were then forced through a BioMasher™ (Investigen, Hercules CA) in TRI reagent (Ambion) and extraction was completed using RiboPure® RNA extraction kit (Ambion, Austin, TX). Neonatal cartilage samples were ground in liquid nitrogen over dry ice using a mortar and pestle then extracted using the RiboPure® RNA extraction kit (Ambion, Austin, TX). Testes and liver were homogenized in TRI reagent using a disposable plastic pestle in 1.7 mL eppendorf tubes. DNA was extracted from the same tissues using manufacturer's protocols (<http://www.ambion.com/techlib/append/supp/tri.pdf>). Fetal cartilage samples were homogenized using a motorized mixer and disposable plastic pestle in a 1.7 mL eppendorf tube in lysis solution from the RNAqueous®-4PCR Kit (Ambion) and extraction was completed following manufacturers protocols. DNA extraction on fetal tissue was performed using a DNEasy Blood & Tissue Kit (Qiagen Corp., Valencia CA). The mass of tissue used for DNA extraction varied, but did not exceed 25mg, as is suggested by the manufacturer. The initial tissue lysis and homogenization step was performed using the Kontes 2mL dounce and 180uL of lysis buffer. After tissue homogenization, the extraction procedure follows the routine protocol provided.

Residual DNA was removed from the RNA samples using the Turbo DNA free kit (Ambion, Austin, TX) and samples were stored at -20°C. First-strand cDNA was prepared using SMART MMLV reverse transcriptase and SMARTScript RT (Clontech, Mountain View, CA) using an oligo dT primer with 100 ng to 1 µg of RNA per reaction and standard protocols. PCR across the identifying nucleotide was performed using F-CTGAGTTTTCTAGTAAGACCGGTGAAG and R-ACAGAGAAACATGGGCTGTGG primers. PCR to detect expression of surrounding genes was performed using the following primer pairs: CD36F- CGGAGACATGCTGATTGAGAAG, CD36R- AGCCAGATTGAGAACGGTCATAG; Sema3cF- agtgaatgctgctgacggtaga, Sema3cR- gatgcagagacacttggaac; ActinF- GATCTGGCACCACCTTCTAC, ActinR- CCCAGAGTCCATGACAATACCA; negative control for DNA contamination SQ7415F- GGCTGGTCACCTTGGTCTTCTC, SQ7415R- TATCACTCGGGCTTTGGTTGTG. The products were sequenced using Sanger sequencing methods and BigDye Terminator Sequencing on the ABI3730xl (Applied Biosystems, Santa Clara, CA).



Figure S1. A 5 Kb insert is found only in chondrodysplastic breeds. PCR amplification of a region on chromosome 18 using primers F- cacacagatggaccatgaaataagt and R- ccaattgttcctccatttc produced a 132 bp fragment in non-chondrodysplastic dogs (controls) and a band of ~5000 bp in chondrodysplastic dogs (cases). 1Kb ladder and Low mass ladder are both produced by Invitrogen Corp. (Invitrogen, Carlsbad, CA)

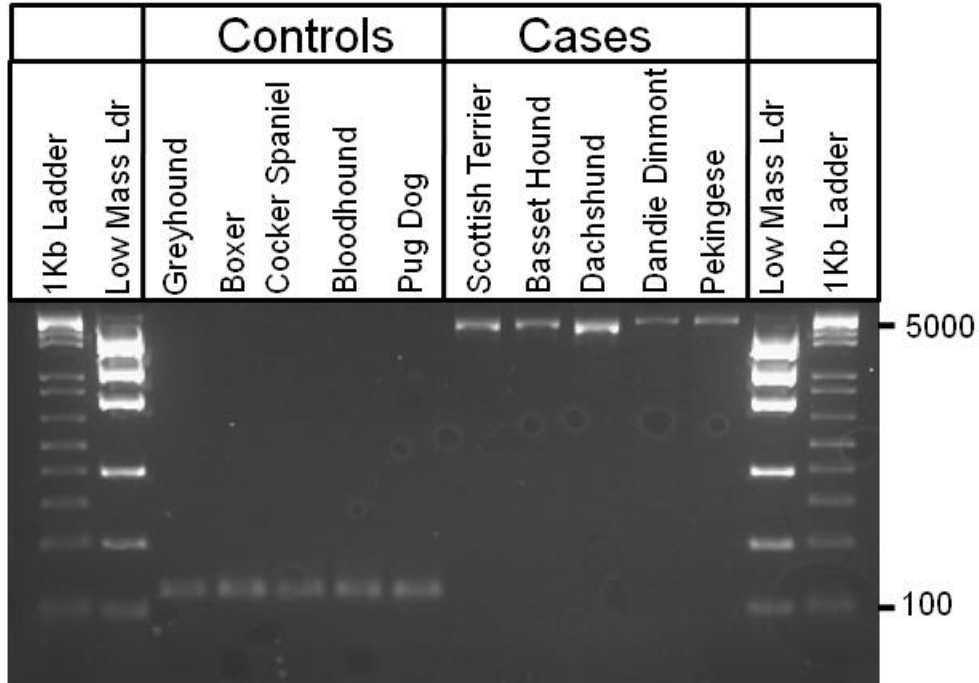

Figure S2. Expression of FGF4 and the genes on either side of the *fgf4*-retroene in cartilage from a) neonatal chondrodysplastic dog and b) fetal non-chondrodysplastic dogs. The negative control amplifies an intronic region of FGF4 (1147 bp) only in genomic DNA. The molecular weight markers used are 100 bp ladder and 1 Kb plus ladder (Invitrogen). Actin is amplified as a positive control for expression in all cell types.

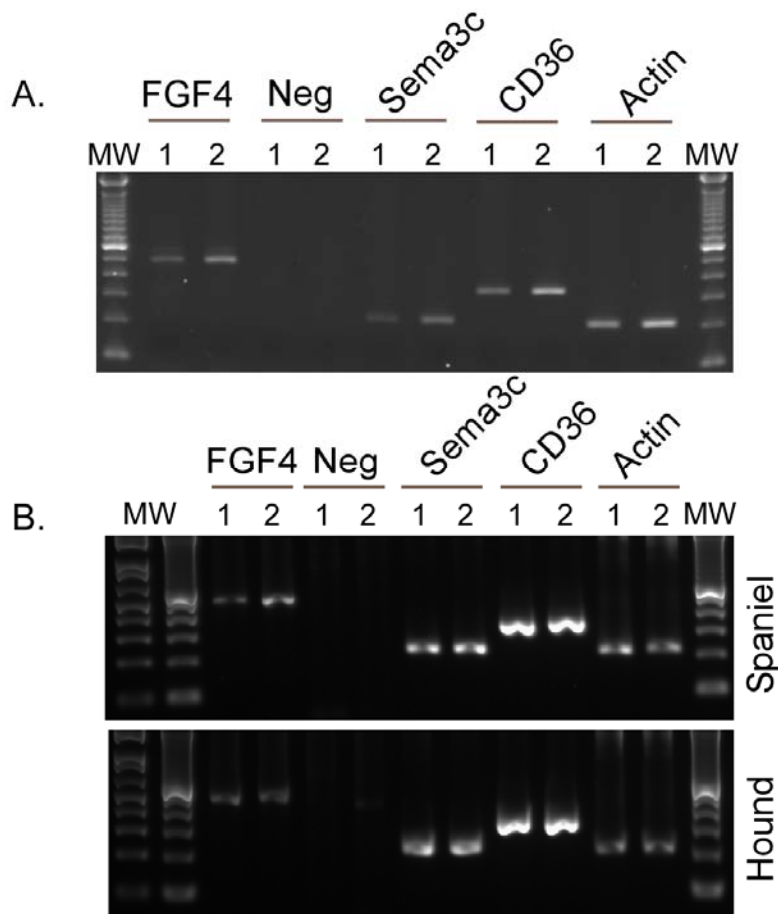

Figure S3. Distribution of haplotypes in the *FGF4* gene and the retrogene insertion site in dog and wolf populations. The combination of haplotypes necessary to produce the first chondrodysplastic dog is shown at the top of the figure. The correct combination was identified only in wolves from Europe and the Middle East. No dogs carried both the insertion site and the *FGF4* haplotype of the ancestor. Breeds or wolf populations are listed if they carry one of the two required haplotypes or if they carry a dog or wolf specific haplotype. See Table S6 for frequency distribution.

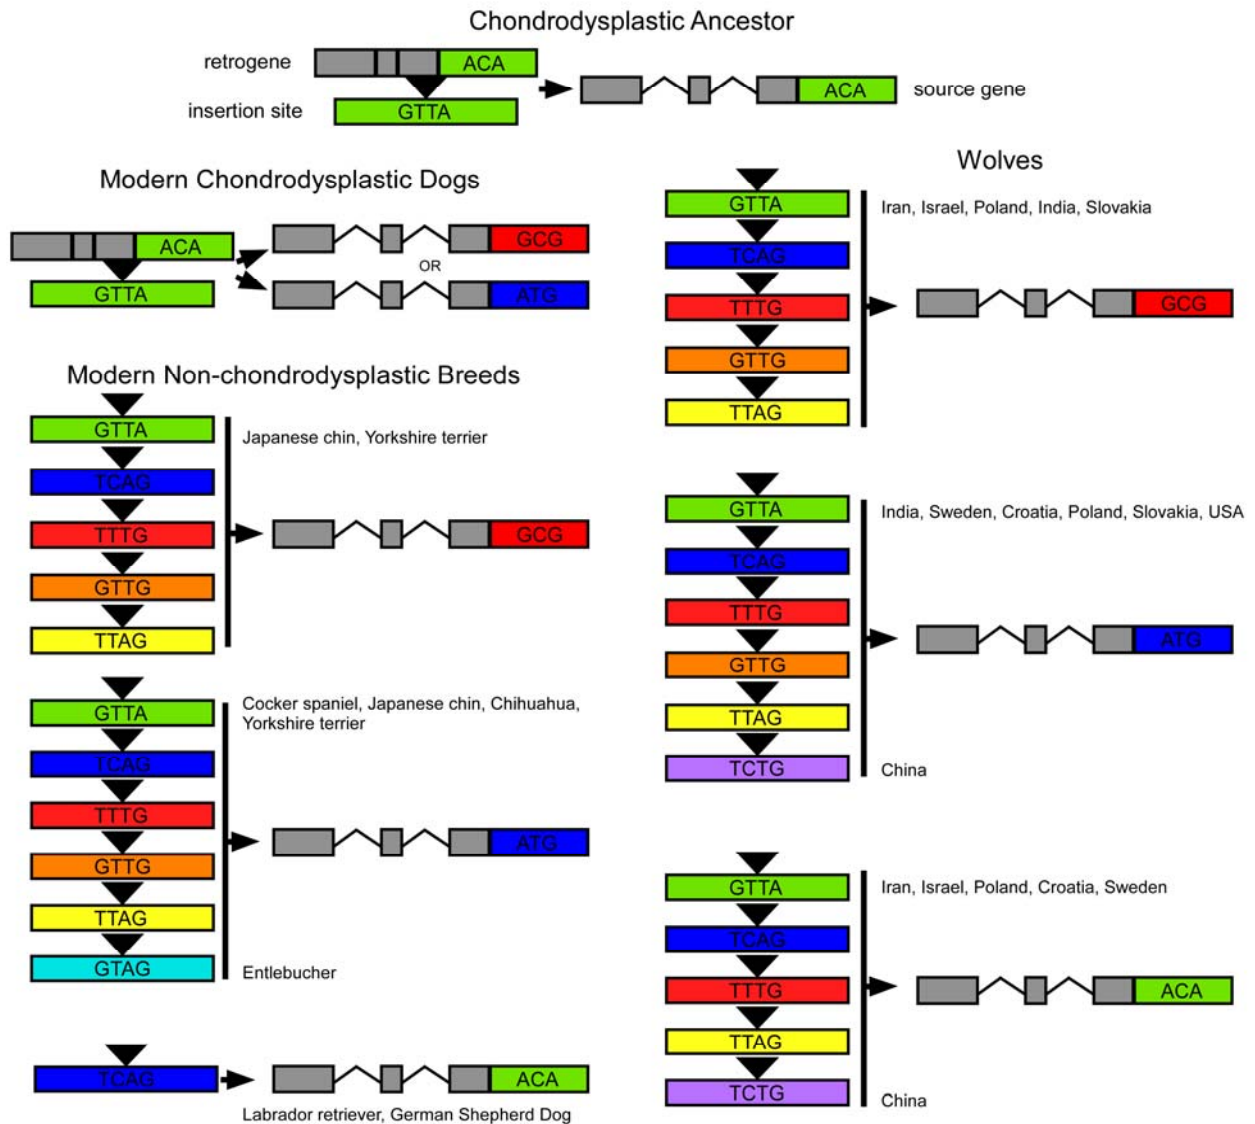

Table S1. List of breeds and number of individuals genotyped for whole genome association analysis.

| Breed                         | Breed_ID | Number | Females | Males | Unspecified<br>Sex | Phenotype <sup>a</sup> |
|-------------------------------|----------|--------|---------|-------|--------------------|------------------------|
| American Cocker Spaniel       | ACKR     | 12     | 5       | 7     | 0                  | Control                |
| American Eskimo Dog           | AESK     | 1      | 1       | 0     | 0                  | Control                |
| Afghan Hound                  | AFGH     | 12     | 5       | 5     | 2                  | Control                |
| Akita                         | AKIT     | 12     | 4       | 7     | 1                  | Control                |
| Alaskan Malamute              | AMAL     | 6      | 1       | 3     | 2                  | Control                |
| Australian Shepherd           | AUSS     | 12     | 7       | 5     | 0                  | Control                |
| Australian Terrier            | AUST     | 12     | 5       | 7     | 0                  | Control                |
| Basset Hound                  | BASS     | 12     | 9       | 3     | 0                  | Case                   |
| Beagle                        | BEAG     | 12     | 9       | 3     | 0                  | Control                |
| Bloodhound                    | BLDH     | 9      | 4       | 5     | 0                  | Control                |
| Bernese Mountain Dog          | BMD-     | 12     | 7       | 4     | 1                  | Control                |
| Border Collie                 | BORD     | 12     | 1       | 1     | 10                 | Control                |
| Borzoi                        | BORZ     | 11     | 4       | 4     | 3                  | Control                |
| Boston Terrier                | BOST     | 6      | 4       | 1     | 1                  | Control                |
| Boxer                         | BOX-     | 12     | 9       | 2     | 1                  | Control                |
| Briard                        | BRIA     | 12     | 10      | 2     | 0                  | Control                |
| Brittany                      | BRIT     | 12     | 0       | 0     | 12                 | Control                |
| Brussels Griffon              | BRUS     | 5      | 3       | 2     | 0                  | Control                |
| Basenji                       | BSJI     | 12     | 5       | 7     | 0                  | Control                |
| Bulldog                       | BULD     | 11     | 6       | 5     | 0                  | Control                |
| Bullmastiff                   | BULM     | 12     | 9       | 3     | 0                  | Control                |
| Bull Terrier                  | BULT     | 3      | 3       | 0     | 0                  | Control                |
| Cairn Terrier                 | CAIR     | 7      | 5       | 2     | 0                  | Control                |
| Cardigan Welsh Corgi          | CARD     | 12     | 6       | 6     | 0                  | Case                   |
| Chihuahua                     | CHIH     | 7      | 5       | 2     | 0                  | Control                |
| Chow Chow                     | CHOW     | 12     | 0       | 0     | 12                 | Control                |
| Cavalier King Charles Spaniel | CKCS     | 9      | 5       | 3     | 1                  | Control                |
| Collie                        | COLL     | 12     | 5       | 7     | 0                  | Control                |
| Dachshund                     | DACH     | 12     | 6       | 6     | 0                  | Case                   |
| Great Dane                    | DANE     | 8      | 6       | 2     | 0                  | Control                |
| Scottish Deerhound            | DEER     | 12     | 2       | 3     | 7                  | Control                |
| Doberman Pinscher             | DOBP     | 12     | 6       | 6     | 0                  | Control                |
| English Springer Spaniel      | ESSP     | 12     | 1       | 8     | 3                  | Control                |
| French Bulldog                | FBUL     | 10     | 7       | 2     | 1                  | Control                |
| Glen of Imaal Terrier         | GLEN     | 12     | 5       | 6     | 1                  | Case                   |
| Golden Retriever              | GOLD     | 12     | 1       | 1     | 10                 | Control                |
| Greyhound                     | GREY     | 9      | 3       | 6     | 0                  | Control                |
| German Shepherd Dog           | GSD-     | 12     | 6       | 4     | 2                  | Control                |
| German Shorthaired            | GSHP     | 10     | 4       | 5     | 1                  | Control                |

|                             |      |    |    |   |   |         |
|-----------------------------|------|----|----|---|---|---------|
| Pointer                     |      |    |    |   |   |         |
| Giant Schnauzer             | GSNZ | 12 | 7  | 5 | 0 | Control |
| Havanese                    | HAVA | 9  | 6  | 3 | 0 | n.d.    |
| Siberian Husky              | HUSK | 12 | 8  | 4 | 0 | Control |
| Ibizan Hound                | IBIZ | 12 | 8  | 4 | 0 | Control |
| Italian Greyhound           | ITGY | 12 | 9  | 3 | 0 | Control |
| Irish Wolfhound             | IWOF | 13 | 4  | 7 | 2 | Control |
| Irish Water Spaniel         | IWSP | 12 | 4  | 8 | 0 | Control |
| Jack Russell Terrier        | JACK | 12 | 7  | 5 | 0 | n.d.    |
| Kuvasz                      | KUVZ | 12 | 5  | 7 | 0 | Control |
| Labrador Retriever          | LAB- | 12 | 3  | 2 | 7 | Control |
| Mastiff                     | MAST | 12 | 8  | 4 | 0 | Control |
| Miniature Bull Terrier      | MBLT | 12 | 8  | 3 | 1 | Control |
| Miniature Pinscher          | MPIN | 12 | 7  | 5 | 0 | Control |
| Newfoundland                | NEWF | 12 | 3  | 7 | 2 | Control |
| Norwich Terrier             | NOWT | 10 | 5  | 5 | 0 | Control |
| Old English Sheepdog        | OES- | 12 | 8  | 4 | 0 | Control |
| Papillon                    | PAPI | 8  | 3  | 3 | 2 | Control |
| Petit Basset Griffon        |      |    |    |   |   |         |
| Vendean                     | PBGV | 11 | 8  | 3 | 0 | Case    |
| Pekingese                   | PEKE | 12 | 5  | 7 | 0 | Case    |
| Pembroke Welsh Corgi        | PEMB | 12 | 6  | 6 | 0 | Case    |
| Pomeranian                  | POM- | 12 | 10 | 2 | 0 | Control |
| Portuguese Water Dog        | PTWD | 12 | 6  | 6 | 0 | Control |
| Pug Dog                     | PUG  | 12 | 6  | 6 | 0 | Control |
| Rottweiler                  | ROTT | 12 | 4  | 7 | 1 | Control |
| Saluki                      | SALU | 12 | 4  | 8 | 0 | Control |
| Samoyed                     | SAMO | 6  | 1  | 4 | 1 | Control |
| Scottish Terrier            | SCOT | 12 | 4  | 8 | 0 | Case    |
| Chinese Shar-Pei            | SHAR | 12 | 6  | 6 | 0 | Control |
| Shih Tzu                    | SHIH | 12 | 7  | 5 | 0 | Control |
| Standard Poodle             | SPOO | 13 | 6  | 7 | 0 | Control |
| Shetland Sheepdog           | SSHP | 12 | 6  | 4 | 2 | Control |
| Standard Schnauzer          | SSNZ | 12 | 5  | 6 | 1 | Control |
| Staffordshire Bull Terrier  | STAF | 12 | 5  | 7 | 0 | Control |
| Saint Bernard               | STBD | 12 | 5  | 2 | 5 | Control |
| Sussex Spaniel              | SUSX | 5  | 2  | 3 | 0 | n.d.    |
| Toy Poodle                  | TPOO | 12 | 5  | 7 | 0 | Control |
| Whippet                     | WHIP | 12 | 6  | 6 | 0 | Control |
| West Highland White Terrier | WHWT | 12 | 3  | 9 | 0 | n.d.    |

a. Case and control status refer to strict chondrodysplastic phenotype assigned in initial analysis and required that the dogs meet all three criteria put forth in materials and methods.

Table S2. Genotypes of 64 SNPs across the associated locus. Dog breeds are listed at the top of the chart, grouped by leg length phenotype. SNP positions are listed on the left in order from the centromeric to the telomeric end of the locus. Homozygous genotypes are shown as 0 (yellow) or 2 (gold), heterozygous genotypes are 1 (blue) and missing data is labeled -9 (white).









Table S3. Positions of SNPs discovered in this study with their genotypes and allele frequencies in 40 dogs. Primers used to obtain the sequences from which the SNPs were discovered are listed in the last two columns of the table.

| Name        | Position | Allele A | Allele B | count A | count B | Cases |      |      |    |    |    | Controls |      |      |      |    |    | Forward Primer | Reverse Primer |                              |                            |
|-------------|----------|----------|----------|---------|---------|-------|------|------|----|----|----|----------|------|------|------|----|----|----------------|----------------|------------------------------|----------------------------|
|             |          |          |          |         |         | Ho    | He   | MAF  | AA | AB | BB | count    | Ho   | He   | MAF  | AA | AB |                |                | BB                           | count                      |
| SQ6686_snp1 | 23281790 | C        | T        | 43      | 45      | 0.12  | 0.23 | 0.13 | 2  | 3  | 21 | 26       | 0    | 0    | 1    | 18 | 0  | 0              | 18             | TTGACTTCGGGATTCCTACTT        | TTGAAGCTATTCAAAAATTACACC   |
| SQ6686_snp2 | 23281792 | A        | G        | 42      | 46      | 0.15  | 0.26 | 0.15 | 2  | 4  | 20 | 26       | 0.11 | 0.1  | 0.94 | 16 | 2  | 0              | 18             | TTGACTTCGGGATTCCTACTT        | TTGAAGCTATTCAAAAATTACACC   |
| SQ6686_snp3 | 23281800 | C        | T        | 48      | 40      | 0.15  | 0.2  | 0.12 | 21 | 4  | 1  | 26       | 0.11 | 0.1  | 0.94 | 0  | 2  | 16             | 18             | TTGACTTCGGGATTCCTACTT        | TTGAAGCTATTCAAAAATTACACC   |
| SQ6686_snp4 | 23281891 | C        | T        | 1       | 87      | 0     | 0    | 0    | 0  | 0  | 26 | 26       | 0.06 | 0.05 | 0.03 | 0  | 1  | 17             | 18             | TTGACTTCGGGATTCCTACTT        | TTGAAGCTATTCAAAAATTACACC   |
| SQ6686_snp5 | 23281991 | A        | G        | 2       | 86      | 0     | 0    | 0    | 0  | 0  | 26 | 26       | 0.11 | 0.1  | 0.06 | 0  | 2  | 16             | 18             | TTGACTTCGGGATTCCTACTT        | TTGAAGCTATTCAAAAATTACACC   |
| SQ6686_snp6 | 23281994 | A        | G        | 48      | 40      | 0.15  | 0.2  | 0.12 | 21 | 4  | 1  | 26       | 0.11 | 0.1  | 0.94 | 0  | 2  | 16             | 18             | TTGACTTCGGGATTCCTACTT        | TTGAAGCTATTCAAAAATTACACC   |
| SQ6686_snp7 | 23282133 | C        | G        | 34      | 52      | 0.15  | 0.2  | 0.12 | 1  | 4  | 21 | 26       | 0.35 | 0.29 | 0.82 | 11 | 6  | 0              | 17             | TTGACTTCGGGATTCCTACTT        | TTGAAGCTATTCAAAAATTACACC   |
| SQ6687_snp1 | 23287316 | G        | T        | 83      | 3       | 0.04  | 0.04 | 0.02 | 25 | 1  | 0  | 26       | 0.12 | 0.11 | 0.06 | 15 | 2  | 0              | 17             | CAAATTTTCATGTTTCATAAGCACA    | CTCAGACTAGATTGGGACAAGTCA   |
| SQ6687_snp2 | 23287414 | A        | G        | 45      | 41      | 0.12  | 0.23 | 0.13 | 21 | 3  | 2  | 26       | 0    | 0    | 1    | 0  | 0  | 17             | 17             | CAAATTTTCATGTTTCATAAGCACA    | CTCAGACTAGATTGGGACAAGTCA   |
| SQ6687_snp3 | 23287678 | C        | T        | 83      | 1       | 0     | 0    | 0    | 26 | 0  | 0  | 26       | 0.06 | 0.06 | 0.03 | 15 | 1  | 0              | 16             | CAAATTTTCATGTTTCATAAGCACA    | CTCAGACTAGATTGGGACAAGTCA   |
| SQ6687_snp4 | 23287719 | C        | T        | 83      | 1       | 0     | 0    | 0    | 26 | 0  | 0  | 26       | 0.06 | 0.06 | 0.03 | 15 | 1  | 0              | 16             | CAAATTTTCATGTTTCATAAGCACA    | CTCAGACTAGATTGGGACAAGTCA   |
| SQ6760_snp1 | 23298053 | C        | T        | 42      | 46      | 0.15  | 0.2  | 0.12 | 1  | 4  | 21 | 26       | 0    | 0    | 1    | 18 | 0  | 0              | 18             | TGAAGGCAACCAAAAGTAAACAG      | ACTTGAATAAGCCACATACC       |
| SQ6760_snp2 | 23298242 | G        | T        | 47      | 41      | 0.15  | 0.2  | 0.12 | 21 | 4  | 1  | 26       | 0.06 | 0.05 | 0.97 | 0  | 1  | 17             | 18             | TGAAGGCAACCAAAAGTAAACAG      | ACTTGAATAAGCCACATACC       |
| SQ6688_snp1 | 23320252 | A        | G        | 38      | 50      | 0.15  | 0.2  | 0.12 | 1  | 4  | 21 | 26       | 0.22 | 0.2  | 0.89 | 14 | 4  | 0              | 18             | TCAAGTAAAGATTAGGTCTGTCAACATT | AACCATAACAAAGAATGAACAGTGA  |
| SQ6688_snp2 | 23320369 | A        | G        | 46      | 42      | 0.15  | 0.2  | 0.12 | 21 | 4  | 1  | 26       | 0    | 0    | 1    | 0  | 0  | 18             | 18             | TCAAGTAAAGATTAGGTCTGTCAACATT | AACCATAACAAAGAATGAACAGTGA  |
| SQ6688_snp3 | 23320471 | C        | T        | 47      | 41      | 0.15  | 0.2  | 0.12 | 21 | 4  | 1  | 26       | 0.06 | 0.05 | 0.97 | 0  | 1  | 17             | 18             | TCAAGTAAAGATTAGGTCTGTCAACATT | AACCATAACAAAGAATGAACAGTGA  |
| SQ6688_snp4 | 23320472 | A        | G        | 46      | 42      | 0.15  | 0.2  | 0.12 | 21 | 4  | 1  | 26       | 0    | 0    | 1    | 0  | 0  | 18             | 18             | TCAAGTAAAGATTAGGTCTGTCAACATT | AACCATAACAAAGAATGAACAGTGA  |
| SQ6688_snp5 | 23320831 | C        | T        | 87      | 1       | 0     | 0    | 0    | 26 | 0  | 0  | 26       | 0.06 | 0.05 | 0.03 | 17 | 1  | 0              | 18             | TCAAGTAAAGATTAGGTCTGTCAACATT | AACCATAACAAAGAATGAACAGTGA  |
| SQ6690_snp1 | 23329007 | G        | T        | 51      | 37      | 0.12  | 0.17 | 0.1  | 22 | 3  | 1  | 26       | 0.22 | 0.2  | 0.89 | 0  | 4  | 14             | 18             | TCCCTGTAATCAAGTACTCCAAAA     | GATGCAGAATCAAATCCAAGTT     |
| SQ6690_snp2 | 23329014 | C        | G        | 11      | 77      | 0.08  | 0.14 | 0.08 | 1  | 2  | 23 | 26       | 0.17 | 0.31 | 0.19 | 2  | 3  | 13             | 18             | TCCCTGTAATCAAGTACTCCAAAA     | GATGCAGAATCAAATCCAAGTT     |
| SQ6693_snp1 | 23334242 | C        | G        | 85      | 3       | 0     | 0    | 0    | 26 | 0  | 0  | 26       | 0.17 | 0.15 | 0.08 | 15 | 3  | 0              | 18             | AACCTGGTGAGTCCATCTCATT       | TTTCTCTGTTAACCAAGCACAAC    |
| SQ6693_snp2 | 23334363 | A        | G        | 81      | 7       | 0.04  | 0.04 | 0.02 | 25 | 1  | 0  | 26       | 0.11 | 0.28 | 0.17 | 14 | 2  | 2              | 18             | AACCTGGTGAGTCCATCTCATT       | TTTCTCTGTTAACCAAGCACAAC    |
| SQ6762_snp1 | 23335392 | A        | T        | 80      | 8       | 0.04  | 0.04 | 0.02 | 25 | 1  | 0  | 26       | 0.17 | 0.31 | 0.19 | 13 | 3  | 2              | 18             | ACCTTGAGAGTGTGTGTCTCTG       | TGAATGGATGAGAGAAGTAAAGG    |
| SQ6696_snp1 | 23347988 | A        | G        | 7       | 81      | 0.04  | 0.04 | 0.02 | 0  | 1  | 25 | 26       | 0.22 | 0.28 | 0.17 | 1  | 4  | 13             | 18             | GTACAGTTCATTTCCCCCATTT       | TTGCATTAATAAGGACGTTGC      |
| SQ6696_snp2 | 23348271 | A        | T        | 1       | 87      | 0     | 0    | 0    | 0  | 0  | 26 | 26       | 0.06 | 0.05 | 0.03 | 0  | 1  | 17             | 18             | GTACAGTTCATTTCCCCCATTT       | TTGCATTAATAAGGACGTTGC      |
| SQ6696_snp4 | 23348398 | C        | G        | 38      | 48      | 0.08  | 0.14 | 0.08 | 1  | 2  | 23 | 26       | 0    | 0    | 1    | 17 | 0  | 0              | 17             | GTACAGTTCATTTCCCCCATTT       | TTGCATTAATAAGGACGTTGC      |
| SQ6697_snp1 | 23349270 | A        | C        | 74      | 6       | 0     | 0    | 0    | 24 | 0  | 0  | 24       | 0.25 | 0.3  | 0.19 | 11 | 4  | 1              | 16             | TCTAAGATAAATTACAACGAATAACCAG | AGAAATTTTTGAAGGGAAAAAGC    |
| SQ6697_snp2 | 23349311 | A        | G        | 4       | 84      | 0     | 0    | 0    | 0  | 0  | 26 | 26       | 0.22 | 0.2  | 0.11 | 0  | 4  | 14             | 18             | TCTAAGATAAATTACAACGAATAACCAG | AGAAATTTTTGAAGGGAAAAAGC    |
| SQ6697_snp3 | 23349475 | A        | G        | 54      | 32      | 0     | 0.08 | 0.04 | 24 | 0  | 1  | 25       | 0.22 | 0.28 | 0.83 | 1  | 4  | 13             | 18             | TCTAAGATAAATTACAACGAATAACCAG | AGAAATTTTTGAAGGGAAAAAGC    |
| SQ6697_snp4 | 23349659 | A        | C        | 81      | 7       | 0     | 0    | 0    | 26 | 0  | 0  | 26       | 0.28 | 0.31 | 0.19 | 12 | 5  | 1              | 18             | TCTAAGATAAATTACAACGAATAACCAG | AGAAATTTTTGAAGGGAAAAAGC    |
| SQ6698_snp1 | 23351610 | A        | G        | 13      | 69      | 0.04  | 0.04 | 0.02 | 0  | 1  | 23 | 24       | 0.35 | 0.46 | 0.35 | 3  | 6  | 8              | 17             | TGGCCAAGTTATTGTGACAT         | TTCTTCAACCAATAGGTCTATGTACT |
| SQ6700_snp1 | 23355666 | C        | T        | 23      | 63      | 0.04  | 0.11 | 0.06 | 1  | 1  | 23 | 25       | 0.33 | 0.49 | 0.56 | 7  | 6  | 5              | 18             | GTAAAGTGGGCAACAACAGG         | ACACCACAACCCATTTTT         |
| SQ6700_snp3 | 23356140 | A        | T        | 81      | 5       | 0     | 0    | 0    | 25 | 0  | 0  | 25       | 0.17 | 0.24 | 0.14 | 14 | 3  | 1              | 18             | GTAAAGTGGGCAACAACAGG         | ACACCACAACCCATTTTT         |
| SQ6702_snp1 | 23357519 | G        | T        | 34      | 50      | 0     | 0.08 | 0.04 | 1  | 0  | 24 | 25       | 0    | 0.11 | 0.94 | 16 | 0  | 1              | 17             | TCATACAACCTTCTTCCCCCATC      | ATAGATCTGCCCGAATTCAC       |
| SQ6702_snp2 | 23357594 | G        | T        | 38      | 50      | 0     | 0.14 | 0.08 | 2  | 0  | 24 | 26       | 0    | 0.1  | 0.94 | 17 | 0  | 1              | 18             | TCATACAACCTTCTTCCCCCATC      | ATAGATCTGCCCGAATTCAC       |
| SQ6702_snp3 | 23357621 | C        | T        | 38      | 50      | 0     | 0.14 | 0.08 | 2  | 0  | 24 | 26       | 0    | 0.1  | 0.94 | 17 | 0  | 1              | 18             | TCATACAACCTTCTTCCCCCATC      | ATAGATCTGCCCGAATTCAC       |
| SQ6703_snp1 | 23358668 | A        | G        | 36      | 50      | 0     | 0.08 | 0.04 | 1  | 0  | 24 | 25       | 0    | 0.1  | 0.94 | 17 | 0  | 1              | 18             | AAAACCATTTTTGGTAAATACCTC     | TCCTGCAACTTGGTTAAGGTC      |
| SQ6704_snp1 | 23358950 | A        | G        | 75      | 9       | 0     | 0    | 0    | 25 | 0  | 0  | 25       | 0.29 | 0.39 | 0.26 | 10 | 5  | 2              | 17             | GACCTTAACCAAGTTCGAGGAG       | CATACTAGGCTTCAATGCTTCAGA   |
| SQ6706_snp1 | 23362488 | A        | C        | 49      | 39      | 0.04  | 0.11 | 0.06 | 24 | 1  | 1  | 26       | 0    | 0    | 1    | 0  | 0  | 18             | 18             | TCCATAACATCCATTCGAGAAC       | TTTGCATAATCAGGGACAAAAT     |
| SQ6707_snp2 | 23363105 | A        | G        | 2       | 82      | 0     | 0    | 0    | 0  | 0  | 26 | 26       | 0    | 0.12 | 0.06 | 1  | 0  | 15             | 16             | CATGAGCACTGACTGTTTTGA        | CATGAGGAGCTTTTTAGGAGGA     |
| SQ6707_snp3 | 23363128 | A        | G        | 2       | 82      | 0     | 0    | 0    | 0  | 0  | 26 | 26       | 0    | 0.12 | 0.06 | 1  | 0  | 15             | 16             | CATGAGCACTGACTGTTTTGA        | CATGAGGAGCTTTTTAGGAGGA     |
| SQ6707_snp4 | 23363177 | A        | T        | 77      | 7       | 0     | 0    | 0    | 26 | 0  | 0  | 26       | 0.19 | 0.34 | 0.22 | 11 | 3  | 2              | 16             | CATGAGCACTGACTGTTTTGA        | CATGAGGAGCTTTTTAGGAGGA     |
| SQ6707_snp5 | 23363487 | G        | T        | 3       | 81      | 0.12  | 0.11 | 0.06 | 0  | 3  | 23 | 26       | 0    | 0    | 0    | 0  | 0  | 16             | 16             | CATGAGCACTGACTGTTTTGA        | CATGAGGAGCTTTTTAGGAGGA     |
| SQ6861_snp1 | 23388940 | A        | C        | 37      | 49      | 0.04  | 0.11 | 0.06 | 1  | 1  | 24 | 26       | 0    | 0    | 1    | 17 | 0  | 0              | 17             | TGTGATACTGCCAACCTCTTCA       | CATGGAACACTACTAACCCAAGAA   |
| SQ6978_snp1 | 23422125 | C        | G        | 50      | 38      | 0.04  | 0.23 | 0.13 | 22 | 1  | 3  | 26       | 0.17 | 0.24 | 0.86 | 1  | 3  | 14             | 18             | AGGATTGGCTCACCTTACTCTG       | AATCAGGAGCATGGCACTTAC      |
| SQ6978_snp2 | 23422296 | C        | T        | 87      | 1       | 0.04  | 0.04 | 0.02 | 25 | 1  | 0  | 26       | 0    | 0    | 0    | 18 | 0  | 0              | 18             | AGGATTGGCTCACCTTACTCTG       | AATCAGGAGCATGGCACTTAC      |
| SQ6863_snp1 | 23422559 | A        | G        | 1       | 87      | 0     | 0    | 0    | 0  | 0  | 26 | 26       | 0.06 | 0.05 | 0.03 | 0  | 1  | 17             | 18             | AGTAAGTGCCATGCTGCTGAT        | AGCTGTTGTTTGTCTAAATGTGCAT  |
| SQ6864_snp1 | 23423632 | A        | T        | 87      | 1       | 0     | 0    | 0    | 26 | 0  | 0  | 26       | 0.06 | 0.05 | 0.03 | 17 | 1  | 0              | 18             | TGTGTCAAGTTGAATCCAGAT        | CAACCAGGCTTACTACGTATAA     |
| SQ7122_snp2 | 23424673 | G        | T        | 53      | 35      | 0     | 0    | 0    | 26 | 0  | 0  | 26       | 0.06 | 0.05 | 0.97 | 0  | 1  | 17             | 18             | gggcaaggtagttcaagatgac       | CCTAACAGTTTGTGGCTGTTG      |
| SQ6865_snp1 | 23427327 | C        | T        | 16      | 70      | 0     | 0    | 0    | 0  | 0  | 26 | 26       | 0.24 | 0.5  | 0.47 | 6  | 4  | 7              | 17             | AACATTTCTGGGATAGATCA         | TTGGAATGGTATGGCCTGGT       |
| SQ6866_snp1 | 23428753 | A        | T        | 29      | 59      | 0     | 0    | 0    | 0  | 0  | 26 | 26       | 0.17 | 0.31 | 0.81 | 13 | 3  | 2              | 18             | AAATTTTGGCCATTCAATTC         | CACACTGATTGGTTTGTGGA       |
| SQ6866_snp2 | 23429085 | A        | G        | 81      | 7       | 0     | 0    | 0    | 26 | 0  | 0  | 26       | 0.17 | 0.31 | 0.19 | 13 | 3  | 2              | 18             | AAATTTTGGCCATTCAATTC         | CACACTGATTGGTTTGTGGA       |
| SQ6953_snp3 | 23429150 | A        | T        | 85      | 1       | 0     | 0    | 0    | 26 | 0  | 0  | 26       | 0.06 | 0.06 | 0.03 | 16 | 1  | 0              | 17             | ATGCTACTGAAAGCCAATGGA        | CCTCCAGCTTTGTGCCTGTAT      |
| SQ6953_snp5 | 23429633 | A        | G        | 52      | 36      | 0     | 0    | 0    | 26 | 0  | 0  | 26       | 0    | 0    | 1    | 0  | 0  | 18             | 18             | ATGCTACTGAAAGCCAATGGA        | CCTCCAGCTTTGTGCCTGTAT      |
| SQ6953_snp6 | 23429758 | A        | C        | 76      | 10      | 0     | 0    | 0    | 25 | 0  | 0  | 25       | 0.22 | 0.4  | 0.28 | 11 | 4  | 3              | 18             | ATGCTACTGAAAGCCAATGGA        | CCTCCAGCTTTGTGCCTGTAT      |
| SQ6953_snp7 | 23429809 | A        | G        | 85      | 1       | 0     | 0    | 0    | 25 | 0  | 0  | 25       | 0.06 | 0.05 | 0.03 | 17 | 1  | 0              | 18             | ATGCTACTGAAAGCCAATGGA        | CCTCCAGCTTTGTGCCTGTAT      |
| SQ6954_snp2 | 23430032 | C        | T        | 80      | 6       | 0     | 0    | 0    | 26 | 0  | 0  | 26       | 0.12 | 0.29 | 0.18 | 13 | 2  | 2              | 17             | AAAGGAGACTGAAATGAATAGAAAGA   | TTGGCTACTAATCCCTTATTGGAC   |
| SQ6954_snp3 | 23430303 | A        | G        | 60      | 28      | 0     | 0    | 0    | 26 | 0  | 0  | 26       | 0    | 0.35 | 0.78 | 4  | 0  | 14             | 18             | AAAGGAGACTGAAATGAATAGAAAGA   | TTGGCTACTAATCCCTTATTGGAC   |

|             |          |   |   |    |    |      |      |      |    |    |    |      |      |      |      |    |    |    |                            |                              |                               |
|-------------|----------|---|---|----|----|------|------|------|----|----|----|------|------|------|------|----|----|----|----------------------------|------------------------------|-------------------------------|
| insert      | 23431136 | N | Y | 36 | 52 | 0    | 0    | 0    | 0  | 0  | 26 | 26   | 0    | 0    | 1    | 18 | 0  | 0  | 18                         | ttgacatqaataaqtcaqacq        | ccaattttccctccatttc           |
| SQ6867_snp1 | 23432408 | A | G | 52 | 34 | 0    | 0    | 0    | 26 | 0  | 0  | 26   | 0    | 0    | 1    | 0  | 0  | 17 | 17                         | TTACCCACAAGGAAGATACAGC       | CTTTGCCATTAGAGCCACAA          |
| SQ6867_snp2 | 23432759 | C | T | 76 | 10 | 0    | 0    | 0    | 26 | 0  | 0  | 26   | 0.35 | 0.42 | 0.29 | 9  | 6  | 2  | 17                         | TTACCCACAAGGAAGATACAGC       | CTTTGCCATTAGAGCCACAA          |
| SQ6867_snp4 | 23432963 | C | T | 10 | 74 | 0    | 0    | 0    | 0  | 26 | 26 | 0.38 | 0.43 | 0.31 | 2    | 6  | 8  | 16 | TTACCCACAAGGAAGATACAGC     | CTTTGCCATTAGAGCCACAA         |                               |
| SQ6867_snp5 | 23432974 | C | T | 10 | 72 | 0    | 0    | 0    | 0  | 26 | 26 | 0.4  | 0.44 | 0.33 | 2    | 6  | 7  | 15 | TTACCCACAAGGAAGATACAGC     | CTTTGCCATTAGAGCCACAA         |                               |
| SQ6958_snp1 | 23433369 | A | G | 8  | 70 | 0    | 0    | 0    | 0  | 26 | 26 | 0    | 0.43 | 0.31 | 4    | 0  | 9  | 13 | GAACATAGCCTTGGCCTTAACA     | GAGAAATGAGTATGCCCTTATTTCG    |                               |
| SQ6958_snp2 | 23433377 | C | T | 70 | 8  | 0    | 0    | 0    | 26 | 0  | 0  | 26   | 0    | 0.43 | 0.31 | 9  | 0  | 4  | 13                         | GAACATAGCCTTGGCCTTAACA       | GAGAAATGAGTATGCCCTTATTTCG     |
| SQ6958_snp3 | 23433435 | C | G | 8  | 70 | 0    | 0    | 0    | 0  | 26 | 26 | 0    | 0.43 | 0.31 | 4    | 0  | 9  | 13 | GAACATAGCCTTGGCCTTAACA     | GAGAAATGAGTATGCCCTTATTTCG    |                               |
| SQ6958_snp4 | 23433720 | A | C | 8  | 68 | 0    | 0    | 0    | 0  | 25 | 25 | 0    | 0.43 | 0.31 | 4    | 0  | 9  | 13 | GAACATAGCCTTGGCCTTAACA     | GAGAAATGAGTATGCCCTTATTTCG    |                               |
| SQ7002_snp1 | 23434231 | C | T | 75 | 11 | 0    | 0    | 0    | 26 | 0  | 0  | 26   | 0.06 | 0.44 | 0.32 | 11 | 1  | 5  | 17                         | ACTCTGCTGCTCACCTTTCTTC       | CCTCAGGGTCACAATGACAAC         |
| SQ7002_snp2 | 23434855 | C | G | 60 | 8  | 0    | 0    | 0    | 20 | 0  | 0  | 20   | 0.14 | 0.41 | 0.29 | 9  | 2  | 3  | 14                         | ACTCTGCTGCTCACCTTTCTTC       | CCTCAGGGTCACAATGACAAC         |
| SQ6960_snp1 | 23434956 | C | T | 75 | 7  | 0    | 0    | 0    | 26 | 0  | 0  | 26   | 0.33 | 0.36 | 0.23 | 9  | 5  | 1  | 15                         | ATCCCCAGTACCTGTGGTTG         | AAAGTGATTTTTAATGTTGGTGAT      |
| SQ6960_snp2 | 23435142 | A | C | 10 | 78 | 0    | 0    | 0    | 0  | 26 | 26 | 0.11 | 0.4  | 0.28 | 4    | 2  | 12 | 18 | ATCCCCAGTACCTGTGGTTG       | AAAGTGATTTTTAATGTTGGTGAT     |                               |
| SQ6960_snp3 | 23435322 | C | T | 8  | 78 | 0    | 0    | 0    | 0  | 26 | 26 | 0.12 | 0.36 | 0.24 | 3    | 2  | 12 | 17 | ATCCCCAGTACCTGTGGTTG       | AAAGTGATTTTTAATGTTGGTGAT     |                               |
| SQ6960_snp4 | 23435327 | C | T | 8  | 76 | 0    | 0    | 0    | 0  | 25 | 25 | 0.12 | 0.36 | 0.24 | 3    | 2  | 12 | 17 | ATCCCCAGTACCTGTGGTTG       | AAAGTGATTTTTAATGTTGGTGAT     |                               |
| SQ6961_snp1 | 23435847 | A | G | 87 | 1  | 0    | 0    | 0    | 26 | 0  | 0  | 26   | 0.06 | 0.05 | 0.03 | 17 | 1  | 0  | 18                         | ACCTGTCTCACACTTTTCACC        | GAGAAGATACCATTAGAAGTCAATAAGG  |
| SQ6961_snp2 | 23436094 | A | C | 10 | 76 | 0    | 0    | 0    | 0  | 25 | 25 | 0.11 | 0.4  | 0.28 | 4    | 2  | 12 | 18 | ACCTGTCTCACACTTTTCACC      | GAGAAGATACCATTAGAAGTCAATAAGG |                               |
| SQ6962_snp9 | 23436299 | T | C | 78 | 4  | 0    | 0    | 0    | 24 | 0  | 0  | 24   | 0.24 | 0.21 | 0.12 | 13 | 4  | 0  | 17                         | TTTACTGAAACTGAATGCACAAAG     | ATCGCAATTCTCCAAAAGAAG         |
| SQ6962_snp8 | 23436310 | G | C | 2  | 78 | 0    | 0    | 0    | 0  | 24 | 24 | 0.13 | 0.12 | 0.06 | 0    | 2  | 14 | 17 | TTTACTGAAACTGAATGCACAAAG   | ATCGCAATTCTCCAAAAGAAG        |                               |
| SQ6962_snp7 | 23436404 | G | A | 77 | 3  | 0    | 0    | 0    | 24 | 0  | 0  | 24   | 0.19 | 0.17 | 0.09 | 13 | 3  | 0  | 16                         | TTTACTGAAACTGAATGCACAAAG     | ATCGCAATTCTCCAAAAGAAG         |
| SQ6962_snp6 | 23436476 | T | C | 4  | 78 | 0    | 0    | 0    | 0  | 24 | 24 | 0.12 | 0.21 | 0.12 | 1    | 2  | 14 | 17 | TTTACTGAAACTGAATGCACAAAG   | ATCGCAATTCTCCAAAAGAAG        |                               |
| SQ6962_snp5 | 23436611 | T | A | 3  | 79 | 0    | 0    | 0    | 0  | 24 | 24 | 0.18 | 0.16 | 0.09 | 0    | 3  | 14 | 17 | TTTACTGAAACTGAATGCACAAAG   | ATCGCAATTCTCCAAAAGAAG        |                               |
| SQ6962_snp4 | 23436662 | G | T | 80 | 2  | 0    | 0    | 0    | 24 | 0  | 0  | 24   | 0.12 | 0.11 | 0.06 | 15 | 2  | 0  | 17                         | TTTACTGAAACTGAATGCACAAAG     | ATCGCAATTCTCCAAAAGAAG         |
| SQ6963_snp1 | 23436774 | A | G | 15 | 69 | 0    | 0    | 0    | 0  | 26 | 26 | 0.19 | 0.5  | 0.47 | 6    | 3  | 7  | 16 | TCACATATTTTACTTACTCCATTCA  | TTTATCCTTGCTGTTCCACAA        |                               |
| SQ6962_snp2 | 23436864 | T | C | 2  | 78 | 0    | 0    | 0    | 0  | 24 | 24 | 0.13 | 0.12 | 0.06 | 0    | 2  | 14 | 16 | TTTACTGAAACTGAATGCACAAAG   | ATCGCAATTCTCCAAAAGAAG        |                               |
| SQ6963_snp2 | 23436962 | G | A | 34 | 50 | 0    | 0    | 0    | 0  | 25 | 25 | 0    | 0    | 1    | 17   | 0  | 0  | 17 | TCACATATTTTACTTACTCCATTCA  | TTTATCCTTGCTGTTCCACAA        |                               |
| SQ6964_snp1 | 23437569 | C | T | 2  | 78 | 0    | 0    | 0    | 0  | 24 | 24 | 0.13 | 0.12 | 0.06 | 0    | 2  | 14 | 16 | AAGGAAAAACCTATGCACTTTCA    | ACTGAAGATACAATGCAACATGATTA   |                               |
| SQ6964_snp2 | 23437685 | A | T | 70 | 6  | 0    | 0    | 0    | 23 | 0  | 0  | 23   | 0.13 | 0.32 | 0.2  | 11 | 2  | 2  | 15                         | AAGGAAAAACCTATGCACTTTCA      | ACTGAAGATACAATGCAACATGATTA    |
| SQ6964_snp3 | 23438050 | C | T | 11 | 69 | 0    | 0    | 0    | 0  | 25 | 25 | 0.2  | 0.46 | 0.37 | 4    | 3  | 8  | 15 | AAGGAAAAACCTATGCACTTTCA    | ACTGAAGATACAATGCAACATGATTA   |                               |
| SQ6964_snp4 | 23438173 | C | T | 80 | 2  | 0    | 0    | 0    | 25 | 0  | 0  | 25   | 0    | 0.12 | 0.06 | 15 | 0  | 1  | 16                         | AAGGAAAAACCTATGCACTTTCA      | ACTGAAGATACAATGCAACATGATTA    |
| SQ6964_snp5 | 23438199 | A | G | 83 | 1  | 0    | 0    | 0    | 25 | 0  | 0  | 25   | 0.06 | 0.06 | 0.03 | 16 | 1  | 0  | 17                         | AAGGAAAAACCTATGCACTTTCA      | ACTGAAGATACAATGCAACATGATTA    |
| SQ6965_snp3 | 23438534 | A | G | 22 | 60 | 0    | 0    | 0    | 0  | 25 | 25 | 0.13 | 0.43 | 0.69 | 10   | 2  | 4  | 16 | TCAAAGCAGTTGGTTAGAGACC     | AAAAAGAGGAAAATCTAAGTTGAAGA   |                               |
| SQ6965_snp4 | 23438581 | C | T | 1  | 81 | 0    | 0    | 0    | 0  | 25 | 25 | 0.06 | 0.06 | 0.03 | 0    | 1  | 15 | 16 | TCAAAGCAGTTGGTTAGAGACC     | AAAAAGAGGAAAATCTAAGTTGAAGA   |                               |
| SQ6965_snp5 | 23438978 | C | T | 81 | 1  | 0    | 0    | 0    | 25 | 0  | 0  | 25   | 0.06 | 0.06 | 0.03 | 15 | 1  | 0  | 16                         | TCAAAGCAGTTGGTTAGAGACC       | AAAAAGAGGAAAATCTAAGTTGAAGA    |
| SQ6966_snp1 | 23439394 | C | T | 76 | 2  | 0    | 0    | 0    | 24 | 0  | 0  | 24   | 0    | 0.12 | 0.07 | 14 | 0  | 1  | 15                         | GGCAGAGGAGGAAGGATTGA         | TCAACACTGACAGCCACTCAG         |
| SQ6967_snp1 | 23440116 | C | T | 2  | 74 | 0    | 0    | 0    | 0  | 23 | 23 | 0    | 0.12 | 0.07 | 1    | 0  | 14 | 15 | CAAATCTAGGCATTCTGACTCCA    | TCCATATACCTCTTCTGCTCTACAA    |                               |
| SQ6660_snp1 | 23445698 | A | C | 1  | 81 | 0    | 0    | 0    | 0  | 26 | 26 | 0.07 | 0.06 | 0.03 | 0    | 1  | 14 | 15 | GGCAGTCATGTTGAAGAAGAA      | GAACCTTTTATCCAAATAGCAA       |                               |
| SQ6660_snp2 | 23445875 | C | T | 25 | 55 | 0    | 0    | 0    | 0  | 26 | 26 | 0.07 | 0.19 | 0.89 | 12   | 1  | 1  | 14 | GGCAGTCATGTTGAAGAAGAA      | GAACCTTTTATCCAAATAGCAA       |                               |
| SQ6662_snp1 | 23447509 | C | G | 58 | 24 | 0.12 | 0.41 | 0.29 | 17 | 3  | 6  | 26   | 0.2  | 0.42 | 0.3  | 9  | 3  | 3  | 15                         | GATGCCCTCTTCTTGAACCTGT       | CTGAAATGGTGGCTGTTGTG          |
| SQ6663_snp1 | 23447868 | G | T | 40 | 44 | 0.12 | 0.38 | 0.75 | 18 | 3  | 5  | 26   | 0.06 | 0.06 | 0.03 | 0  | 1  | 15 | 16                         | TAAGCCCAAGGAAGAGAACAT        | TCCGAATCCCAAGCTTCACTC         |
| SQ6664_snp1 | 23450779 | A | T | 65 | 19 | 0.12 | 0.34 | 0.22 | 18 | 3  | 4  | 25   | 0.24 | 0.36 | 0.24 | 11 | 4  | 2  | 17                         | AGCTTGGGATTGTATCCATTG        | ATATGAACATCTTTTATGCTTTGG      |
| SQ6664_snp2 | 23450797 | C | T | 40 | 44 | 0.12 | 0.34 | 0.78 | 18 | 3  | 4  | 25   | 0.06 | 0.06 | 0.03 | 0  | 1  | 16 | 17                         | AGCTTGGGATTGTATCCATTG        | ATATGAACATCTTTTATGCTTTGG      |
| SQ6664_snp3 | 23450879 | C | T | 62 | 24 | 0    | 0    | 0    | 26 | 0  | 0  | 26   | 0.12 | 0.42 | 0.71 | 4  | 2  | 11 | 17                         | AGCTTGGGATTGTATCCATTG        | ATATGAACATCTTTTATGCTTTGG      |
| SQ6664_snp4 | 23451308 | A | G | 43 | 41 | 0.15 | 0.36 | 0.77 | 4  | 4  | 18 | 26   | 0.06 | 0.06 | 0.03 | 15 | 1  | 0  | 16                         | AGCTTGGGATTGTATCCATTG        | ATATGAACATCTTTTATGCTTTGG      |
| SQ6664_snp5 | 23451342 | A | T | 41 | 41 | 0.15 | 0.36 | 0.23 | 18 | 4  | 4  | 26   | 0.07 | 0.06 | 0.97 | 0  | 1  | 14 | 15                         | AGCTTGGGATTGTATCCATTG        | ATATGAACATCTTTTATGCTTTGG      |
| SQ6665_snp6 | 23451742 | A | C | 13 | 71 | 0    | 0    | 0    | 0  | 25 | 25 | 0.29 | 0.47 | 0.38 | 4    | 5  | 8  | 17 | TTTTTATGTTTGTATCTGAACCTCAC | AATTATTTAAGGTTACACAGCCAGT    |                               |
| SQ6665_snp5 | 23451807 | C | G | 39 | 45 | 0.16 | 0.36 | 0.76 | 17 | 4  | 4  | 25   | 0.06 | 0.06 | 0.03 | 0  | 1  | 16 | 17                         | TTTTTATGTTTGTATCTGAACCTCAC   | AATTATTTAAGGTTACACAGCCAGT     |
| SQ6665_snp4 | 23451827 | A | C | 32 | 52 | 0.16 | 0.36 | 0.24 | 4  | 4  | 17 | 25   | 0.35 | 0.48 | 0.59 | 7  | 6  | 4  | 17                         | TTTTTATGTTTGTATCTGAACCTCAC   | AATTATTTAAGGTTACACAGCCAGT     |
| SQ6665_snp3 | 23451841 | C | T | 52 | 32 | 0.16 | 0.36 | 0.24 | 17 | 4  | 4  | 25   | 0.35 | 0.48 | 0.59 | 4  | 6  | 7  | 17                         | TTTTTATGTTTGTATCTGAACCTCAC   | AATTATTTAAGGTTACACAGCCAGT     |
| SQ6665_snp2 | 23452108 | A | C | 43 | 39 | 0.16 | 0.36 | 0.76 | 4  | 4  | 17 | 25   | 0.06 | 0.06 | 0.03 | 15 | 1  | 0  | 16                         | TTTTTATGTTTGTATCTGAACCTCAC   | AATTATTTAAGGTTACACAGCCAGT     |
| SQ6665_snp1 | 23452115 | A | G | 41 | 39 | 0.16 | 0.36 | 0.76 | 4  | 4  | 17 | 25   | 0.07 | 0.06 | 0.03 | 14 | 1  | 0  | 15                         | TTTTTATGTTTGTATCTGAACCTCAC   | AATTATTTAAGGTTACACAGCCAGT     |
| SQ6869_snp1 | 23468179 | C | T | 28 | 58 | 0.16 | 0.36 | 0.24 | 4  | 4  | 17 | 25   | 0.44 | 0.49 | 0.44 | 4  | 8  | 6  | 18                         | GGGACCTAAGCAAAGCAACTTA       | CTTGGGCTGCATCTTCTTCA          |
| SQ6869_snp2 | 23468257 | A | C | 20 | 66 | 0.16 | 0.36 | 0.24 | 4  | 4  | 17 | 25   | 0.22 | 0.35 | 0.22 | 2  | 4  | 12 | 18                         | GGGACCTAAGCAAAGCAACTTA       | CTTGGGCTGCATCTTCTTCA          |
| SQ6869_snp3 | 23468387 | C | T | 66 | 20 | 0.16 | 0.36 | 0.24 | 17 | 4  | 4  | 25   | 0.22 | 0.35 | 0.22 | 12 | 4  | 2  | 18                         | GGGACCTAAGCAAAGCAACTTA       | CTTGGGCTGCATCTTCTTCA          |
| SQ6870_snp1 | 23468632 | A | T | 68 | 20 | 0.15 | 0.36 | 0.23 | 18 | 4  | 4  | 26   | 0.22 | 0.35 | 0.22 | 12 | 4  | 2  | 18                         | GGGCCTAGTATTTGCCACAG         | TTTTCTGTTTTATTGCTTTCAACTC     |
| SQ6870_snp2 | 23468637 | C | T | 34 | 54 | 0.15 | 0.36 | 0.23 | 4  | 4  | 18 | 26   | 0.33 | 0.48 | 0.61 | 8  | 6  | 4  | 18                         | GGGCCTAGTATTTGCCACAG         | TTTTCTGTTTTATTGCTTTCAACTC     |
| SQ6870_snp3 | 23469105 | A | T | 57 | 25 | 0.12 | 0.34 | 0.22 | 18 | 3  | 4  | 25   | 0.38 | 0.49 | 0.44 | 6  | 6  | 4  | 16                         | GGGCCTAGTATTTGCCACAG         | TTTTCTGTTTTATTGCTTTCAACTC     |
| SQ6867_snp3 | 23482890 | A | G | 9  | 75 | 0    | 0    | 0    | 0  | 26 | 26 | 0.44 | 0.4  | 0.28 | 1    | 7  | 8  | 16 | TTACCCACAAGGAAGATACAGC     | CTTTGCCATTAGAGCCACAA         |                               |
| SQ6884_snp1 | 23539415 | A | G | 76 | 12 | 0.19 | 0.17 | 0.1  | 21 | 5  | 0  | 26   | 0.17 | 0.31 | 0.19 | 13 | 3  | 2  | 18                         | TGAAGCTAGACAGTGAGAAATGAAC    | TTGATTAACAAACATAAAACATTGAGAGA |
| SQ6884_snp2 | 23539437 | A | G | 86 | 2  | 0    | 0    | 0    | 26 | 0  | 0  | 26   | 0    | 0.1  | 0.06 | 17 | 0  |    |                            |                              |                               |

Table S4. Insert frequency and genotypes in multiple breeds of dog and the wolf.

| Breed                                     | Number<br>of Dogs | Insert<br>Frequency | Genotypes <sup>a</sup> |    |    |
|-------------------------------------------|-------------------|---------------------|------------------------|----|----|
|                                           |                   |                     | NN                     | IN | II |
| Afghan Hound                              | 4                 | 0.00                | 4                      | 0  | 0  |
| Akita                                     | 3                 | 0.00                | 3                      | 0  | 0  |
| Anatolian Shepherd                        | 4                 | 0.00                | 4                      | 0  | 0  |
| Australian Cattle Dog                     | 1                 | 0.00                | 1                      | 0  | 0  |
| Basenji                                   | 9                 | 0.00                | 9                      | 0  | 0  |
| Basset Hound                              | 15                | 1.00                | 0                      | 0  | 15 |
| Beagle                                    | 8                 | 0.00                | 8                      | 0  | 0  |
| Bloodhound                                | 4                 | 0.00                | 4                      | 0  | 0  |
| Border Collie                             | 4                 | 0.00                | 4                      | 0  | 0  |
| Boxer                                     | 1                 | 0.00                | 1                      | 0  | 0  |
| Bulldog                                   | 3                 | 0.00                | 3                      | 0  | 0  |
| Bullmastiff                               | 8                 | 0.00                | 8                      | 0  | 0  |
| Cairn Terrier                             | 7                 | 1.00                | 0                      | 0  | 7  |
| Cardigan Welsh Corgi                      | 13                | 1.00                | 0                      | 0  | 13 |
| Cavalier King Charles Spaniel             | 4                 | 0.00                | 4                      | 0  | 0  |
| Chihuahua <sup>b</sup>                    | 3                 | 0.33                | 0                      | 2  | 1  |
| Clumber Spaniel                           | 4                 | 0.00                | 4                      | 0  | 0  |
| Cocker Spaniel                            | 8                 | 0.00                | 8                      | 0  | 0  |
| Collie                                    | 4                 | 0.00                | 4                      | 0  | 0  |
| Dachshund                                 | 14                | 1.00                | 0                      | 0  | 14 |
| Dandie Dinmont Terrier                    | 3                 | 1.00                | 0                      | 0  | 3  |
| Doberman Pinscher                         | 7                 | 0.00                | 7                      | 0  | 0  |
| English Foxhound                          | 1                 | 0.00                | 1                      | 0  | 0  |
| English Setter                            | 2                 | 0.00                | 2                      | 0  | 0  |
| Entlebucher                               | 6                 | 0.00                | 6                      | 0  | 0  |
| French Bulldog                            | 4                 | 0.00                | 4                      | 0  | 0  |
| German Shepherd Dog                       | 10                | 0.00                | 10                     | 0  | 0  |
| Giant Schnauzer                           | 4                 | 0.00                | 4                      | 0  | 0  |
| Glen of Imaal Terrier <sup>c</sup>        | 12                | 0.92                | 0                      | 2  | 10 |
| Golden Retriever                          | 4                 | 0.00                | 4                      | 0  | 0  |
| Grand Basset Griffon Vendeen <sup>d</sup> | 4                 | 0.63                | 0                      | 3  | 1  |
| Greyhound                                 | 4                 | 0.00                | 4                      | 0  | 0  |
| Havanese <sup>c</sup>                     | 7                 | 0.93                | 0                      | 1  | 6  |
| Ibizan Hound                              | 8                 | 0.00                | 8                      | 0  | 0  |
| Irish Setter                              | 2                 | 0.00                | 2                      | 0  | 0  |
| Irish Wolfhound                           | 8                 | 0.00                | 8                      | 0  | 0  |
| Italian Greyhound                         | 4                 | 0.00                | 4                      | 0  | 0  |
| Jack Russell Terrier                      | 7                 | 0.00                | 7                      | 0  | 0  |
| Japanese Chin <sup>b</sup>                | 4                 | 0.13                | 3                      | 1  | 0  |

|                                |    |      |    |   |    |
|--------------------------------|----|------|----|---|----|
| Labrador Retriever             | 8  | 0.00 | 8  | 0 | 0  |
| Lancashire Heeler              | 6  | 1.00 | 0  | 0 | 6  |
| Mastiff                        | 4  | 0.00 | 4  | 0 | 0  |
| Miniature Pinscher             | 5  | 0.00 | 5  | 0 | 0  |
| Miniature Poodle               | 4  | 0.00 | 4  | 0 | 0  |
| Norwich Terrier                | 8  | 1.00 | 0  | 0 | 8  |
| Old English Sheepdog           | 11 | 0.00 | 11 | 0 | 0  |
| Pekingese                      | 13 | 1.00 | 0  | 0 | 13 |
| Pembroke Welsh Corgi           | 15 | 1.00 | 0  | 0 | 15 |
| Petit Basset Griffon Vendeen   | 14 | 1.00 | 0  | 0 | 14 |
| Pointer                        | 4  | 0.00 | 4  | 0 | 0  |
| Pomeranian                     | 4  | 0.00 | 4  | 0 | 0  |
| Pug Dog                        | 8  | 0.00 | 8  | 0 | 0  |
| Rhodesian Ridgeback            | 3  | 0.00 | 3  | 0 | 0  |
| Schipperke                     | 3  | 0.00 | 3  | 0 | 0  |
| Scottish Terrier <sup>c</sup>  | 14 | 0.96 | 0  | 1 | 13 |
| Shetland Sheepdog              | 6  | 0.00 | 6  | 0 | 0  |
| Shiba Inu                      | 3  | 0.00 | 3  | 0 | 0  |
| Shih Tzu                       | 10 | 1.00 | 0  | 0 | 10 |
| Siberian Husky                 | 4  | 0.00 | 4  | 0 | 0  |
| Skye Terrier                   | 3  | 1.00 | 0  | 0 | 3  |
| Soft Coated Wheaten Terrier    | 8  | 0.00 | 8  | 0 | 0  |
| Sussex Spaniel                 | 9  | 0.00 | 9  | 0 | 0  |
| Swedish Valhund                | 5  | 1.00 | 0  | 0 | 5  |
| Tibetan Spaniel                | 4  | 1.00 | 0  | 0 | 4  |
| Tibetan Terrier                | 7  | 0.00 | 7  | 0 | 0  |
| Vizsla                         | 3  | 0.00 | 3  | 0 | 0  |
| West Highland White Terrier    | 7  | 1.00 | 0  | 0 | 7  |
| Yorkshire Terrier <sup>b</sup> | 4  | 0.50 | 1  | 2 | 1  |
| Wolf                           | 26 | 0.00 | 26 | 0 | 0  |
| Mixed Breeds <sup>e</sup>      | 12 | 0.63 | 2  | 5 | 5  |

a) N = no insert, I = insert

b) Three of the smallest breeds (adult body weight < 7lbs), the Chihuahua, Japanese chin, and Yorkshire terrier, carry the insert at a much higher frequency than expected since they do not show the phenotype as it is described in this study. We suggest that the extremely low growth rate in these breeds due to unrelated mutations in additional growth factors (9, 10) disguise the effect of the retrogene allowing it to segregate without selective pressure.

c) Four dogs from three chondrodysplastic breeds were found to be heterozygous for the mutation when it was assumed to be fixed within the breed. The first breed, the Glen of Imaal terrier is new to the AKC, having been accepted only 5 years ago. Judging records show that leg length was not completely fixed within the breed as recently as 2002 and was the primary

critique for young dogs (<http://www.irishglenofimaalterrier.nl>). Current records of the same show very little variation and suggest that the trait is now approaching fixation. Sampling of today's puppies would likely reveal little or no heterozygosity at this locus. The Havanese are also a newly recognized breed though not as new as the Glen. This breed struggles with a second form of dwarfism, osteochondrodysplasia, that correlates with a number of health problems (11). The presence of the second mutation may disguise the absence of the retrogene allowing a low level of segregation within the breed. The final breed in which we found one heterozygous individual is the Scottish terrier. This breed is neither new nor variable and the lack of fixation may indicate an unplanned outcrossing, faulty breeding records, or that absolute fixation on a dominant trait is not easy to maintain.

d) The grande basset griffon Vendéen (GBGV) presents a special case. This breed is the taller sister to the petit basset griffon Vendéen (PBGV). They originally came from the same litters with the smaller offspring called Petit and the larger called grande though both are disproportionately short legged compared to their cousins the griffon Vendéen and the grande griffon Vendéen. The two are now separate breeds however the GBGV is not yet recognized by the AKC. The genotypes suggest that the breed may be under balancing selection to maintain the slightly more moderate phenotype of the heterozygote in order to distinguish it from the PBGV. Additional sampling five and ten generations from now would help to address this issue.

e) The mixed breed dogs were identified as possibly chondrodysplastic based on photographic observations. Breed testing was done using the Wisdom Panel™ (Mars, Inc. McLean VA) and suggested that 7 of 12 mixes had a medium or high probability of ancestry with breeds carrying the retrogene. Two of the dogs showed traces of shared ancestry with chondrodysplastic breeds and three (including the two without the retrogene) showed no indication of having ancestors from breeds that we have identified as carrying the *fgf4* retrogene.

Table S5. List of primers use to sequence the *fgf4* retrogene containing insert.

| Primer Name | Primer Sequence               | Tm | Region covered                                                         |
|-------------|-------------------------------|----|------------------------------------------------------------------------|
| SQ7130      | F-CACACAGATGGACCATGAAATAAGT   | 61 |                                                                        |
|             | R-ccaattgttcctccatttc         | 60 | Amplifies entire insert                                                |
| SQ7342      | F-TCGAAACCCTTAACCCACTCATC     |    |                                                                        |
|             | R-ctttccctctggcaaccac         | 64 | from 3'UTR of the retrogene to region on chr18 telomeric to the insert |
| SQ7343      | F-AAGGCTGATTGGAGTTTGTGTC      | 61 |                                                                        |
|             | R-agctggaagttgtacctcttg       | 58 | from 3'UTR of the retrogene to region on chr18 telomeric to the insert |
| SQ7344      | F-TCACGTTTGAGCTATCTTTACCC     | 60 |                                                                        |
|             | R-ctttccctctggcaaccac         | 61 | from 3'UTR of the retrogene to region on chr18 telomeric to the insert |
| SQ7345      | F-GCGTCCCATTGAAACCTTG         | 61 |                                                                        |
|             | R-ctttccctctggcaaccac         | 64 | from 3'UTR of the retrogene to region on chr18 telomeric to the insert |
| SQ7371C     | F-gcaaagatatgcaacaaccaagtatc  | 66 |                                                                        |
|             | R-ACATCACCGACCCTGCCTCTTC      | 67 | from region on chr18 centromeric to the insert to the 3'UTR            |
| SQ7409      | F-GAGCAAGAACGGGAAGACCAAG      | 64 |                                                                        |
|             | R-TTTCAGCGGGAGATGGGTTC        | 64 | from exon 3 into 3'UTR, amplifies both source gene and retrogene       |
| SQ7410      | F-GAGCAAGAACGGGAAGACCAAG      | 63 |                                                                        |
|             | R-TTTATCACTCGGGCTTTGGTTG      | 63 | from exon 3 into 3'UTR, amplifies both source gene and retrogene       |
| SQ7411_seq  | R-GGGAGATGGAGGAAGATTGACTAC    | 62 | used for sequencing within 3'UTR                                       |
| SQ7414      | F-GGTCTTGGCACCTCAACTTCTC      | 62 |                                                                        |
|             | R-ACAGAGAAACATGGGCTGTGG       | 62 | PCR across SNPs in source FGF4 gene from intron3 to 3'UTR              |
| SQ7413      | F-CTGAGTTTTCTAGTAAGACCGGTGAAG | 62 |                                                                        |
|             | R-ACAGAGAAACATGGGCTGTGG       | 62 | sequencing primers for 3'UTR SNPs from SQ7414 or SQ7130 for retrogene  |

Table S6. The frequency of the haplotypes in the *FGF4* gene and the insertion site required to create the *fgf4* retrogene in the original chondrodysplastic dog.

| Insert haplotype  | Total | Dogs carrying the insert <sup>a</sup> | Dogs without the insert | Wolves |
|-------------------|-------|---------------------------------------|-------------------------|--------|
| GTTA <sup>b</sup> | 0.33  | 0.98                                  | 0.01                    | 0.29   |
| GTAG              | 0.00  | 0.00                                  | 0.01                    | 0.00   |
| TCAG              | 0.25  | 0.00                                  | 0.41                    | 0.05   |
| GTTG              | 0.02  | 0.00                                  | 0.01                    | 0.11   |
| TTTG              | 0.14  | 0.00                                  | 0.20                    | 0.18   |
| TTAG              | 0.25  | 0.02                                  | 0.36                    | 0.29   |
| TCTG              | 0.01  | 0.00                                  | 0.00                    | 0.08   |
| FGF4 haplotype    |       |                                       |                         |        |
| ACA <sup>c</sup>  | 0.04  | 0.00                                  | 0.03                    | 0.20   |
| GCG               | 0.29  | 0.38                                  | 0.24                    | 0.36   |
| ATG               | 0.67  | 0.63                                  | 0.73                    | 0.44   |

a. Includes some dogs that are heterozygous for the insert. b. GTTA is the four marker haplotype that represents the region on CFA18 at positions 23,424,674; 23,427,327; 23,428,753; and 23,432,408, into which the retrogene was transposed. The insert is found between the 3<sup>rd</sup> and 4<sup>th</sup> markers. c. ACA is the three marker haplotype from the 3'UTR of *FGF4* that is identical to that found in the *fgf4* retrogene. It is common in the wolf but rare in the domestic dog.



### Supplemental References:

1. N. Rabbee, T. P. Speed, *Bioinformatics* **22**, 7 (2006).
2. N. B. Sutter, D. S. Mosher, M. M. Gray, E. A. Ostrander, *Mamm Genome* **19**, 713 (2008).
3. American Kennel Club, *The Complete Dog Book*. Official Publication of the American Kennel Club (Howell Book House, New York, NY, ed. 19th Edition Revised, 1998).
4. S. Purcell *et al.*, *Am. J. Hum. Genet.* **81**, 559 (2007).
5. K. Lindblad-Toh *et al.*, *Nature* **438**, 803 (2005).
6. S. Rozen, H. Skaletsky, *Methods Mol Biol* **132**, 365 (2000).
7. D. R. Zerbino, E. Birney, *Genome Res* **18**, 821 (2008).
8. C. Guo *et al.*, *Cell Signal* **20**, 1471 (Aug, 2008).
9. N. B. Sutter *et al.*, *Science* **316**, 112 (2007).
10. P. Jones *et al.*, *Genetics* **179**, 1033 (2008).
11. A. N. Starr *et al.*, *J Hered* **98**, 510 (2007).
